# Supplementary material for: Adoptive Transfer of Dendritic Cells Expressing Fas Ligand Modulates Intestinal Inflammation in a Model of Inflammatory Bowel Disease
Source: PubMed Central journal article supplement (PMC4892183; doi:10.4172/2155-9899.1000411), 2016-04-29
Supplement: NIHMS787796-supplement-Supplementary_file.pdf [file NIHMS787796-supplement-Supplementary_file.pdf]

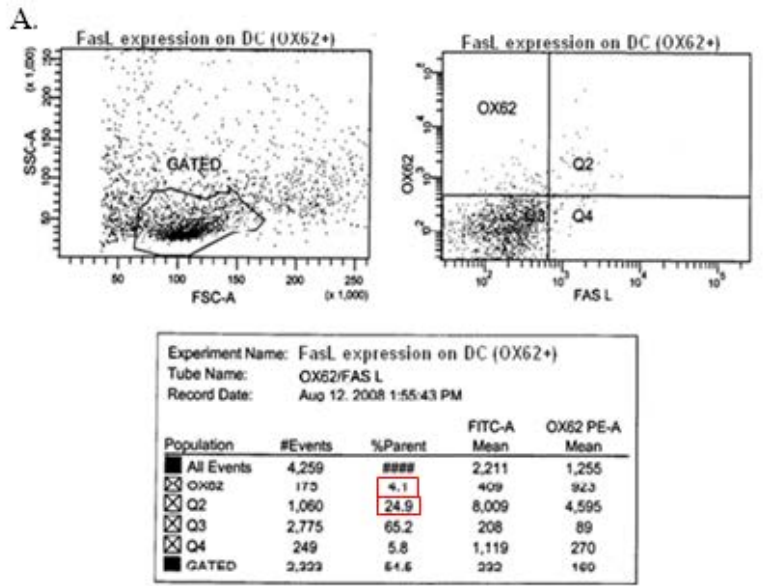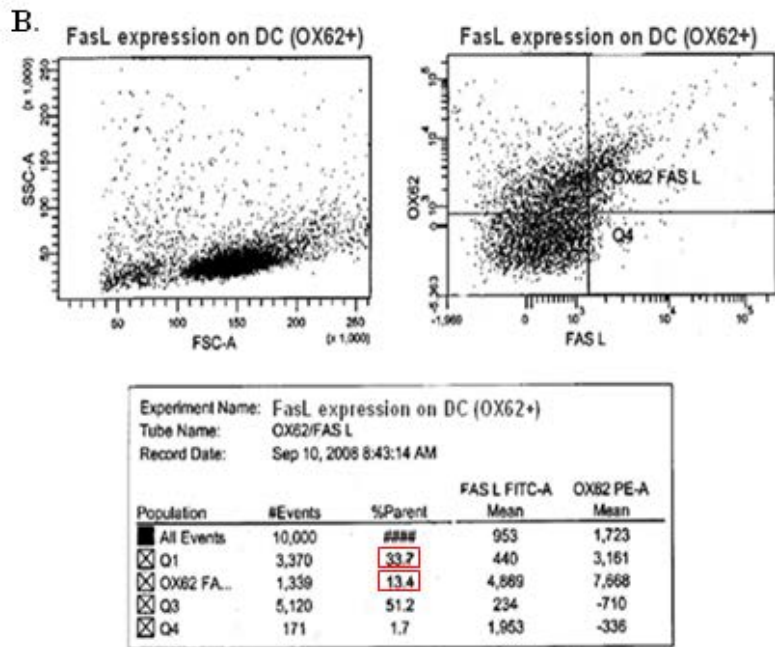

**Supplemental Figure 1. Representative expression of FasL on MLN OX62<sup>+</sup> cells. A, FasL expression on OX62<sup>+</sup> cells from a normal rat. B, FasL expression on OX62<sup>+</sup> cells from a colitis rat.**

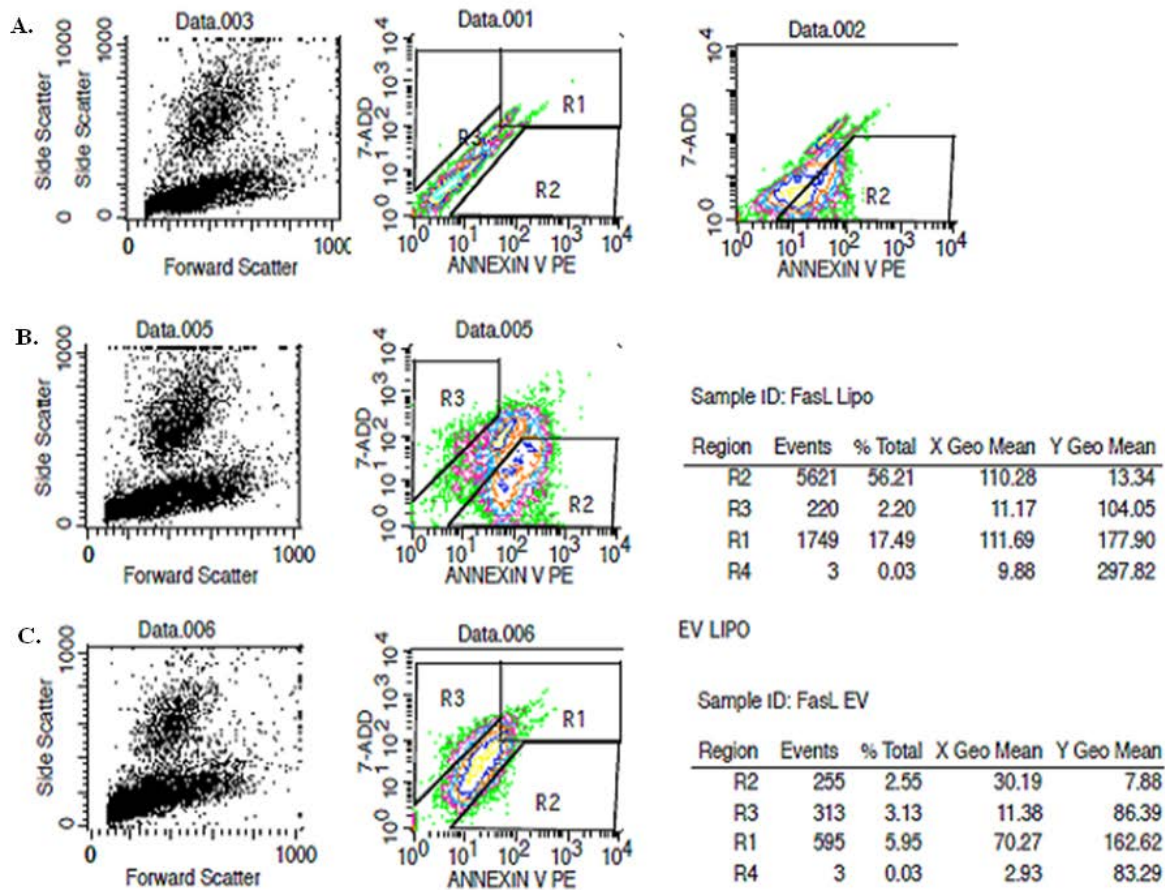

**Supplemental Figure 2. Representative Annexin V staining.** **A**, Control (non-transfected cells). **B**, FasL-DCs cocultured with T cells and treated with fMLP. **C**, EV-DCs cocultured with T cells and treated with fMLP. 5,527% more apoptosis was found in FasL-DCs cocultured with CD4<sup>+</sup>T cells in presence of fMLP in comparison with EV-DCs cocultured with CD4<sup>+</sup>T in the presence of fMLP.
